# Supplementary figures and images for: Drug Conjugates Based on a Monovalent Affibody Targeting Vector Can Efficiently Eradicate HER2 Positive Human Tumors in an Experimental Mouse Model
Source: MDPI journal article supplement (doi:10.3390/cancers13010085), 2020-12-30

|        |     |       |     |        |  |      |          |
|--------|-----|-------|-----|--------|--|------|----------|
| Marker |     | dimar |     |        |  | (HE) | Marker   |
| mE3    | MA3 | E3    | mE3 | mZTag  |  | ECI  |          |
| DMI    | DMI | DMI   | IAA | DMI    |  |      | 20190530 |
|        |     |       |     | Marker |  |      |          |

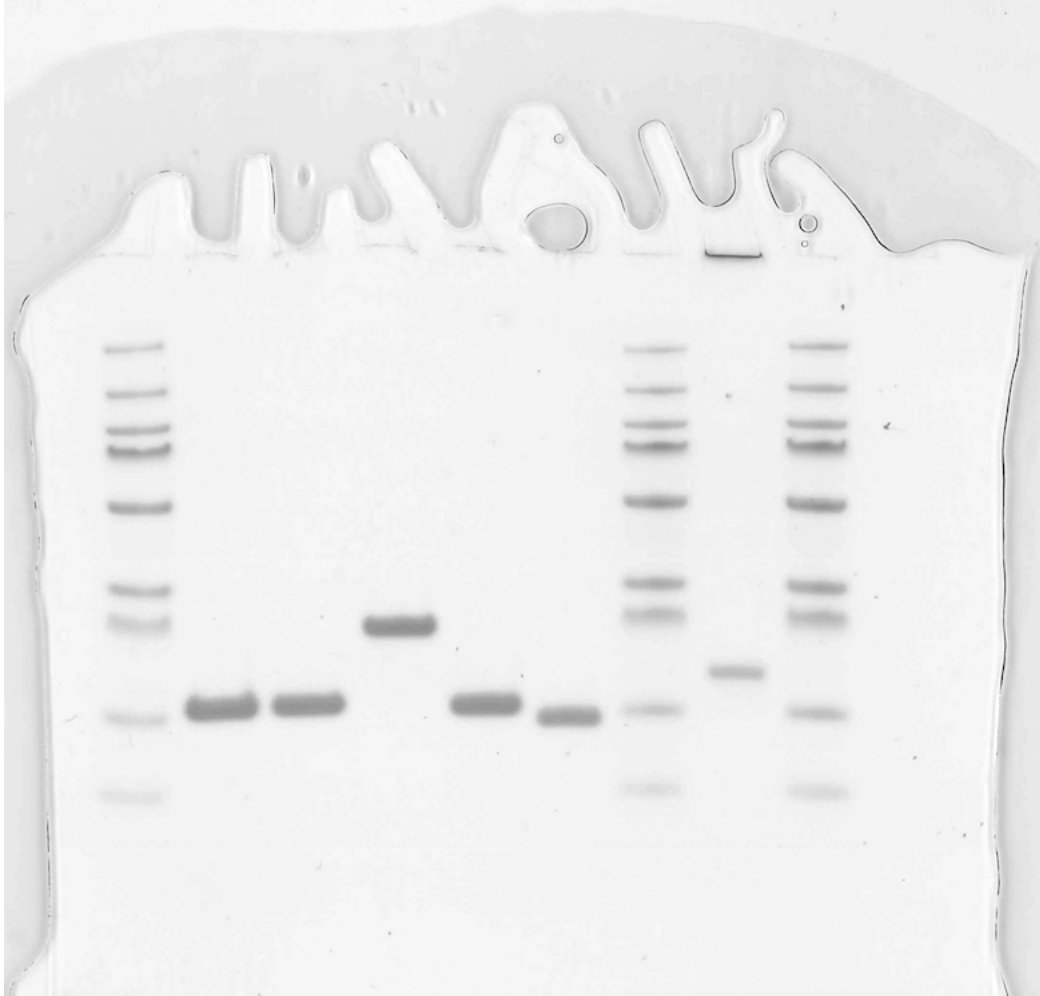

Supplement: s1 [file s1]
